# Supplementary material
Source: PubMed Central journal article supplement (PMC6974596)

# SUPPLEMENTAL FIGURE 1

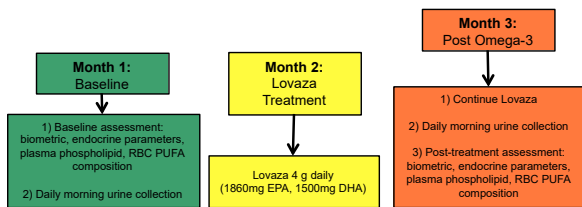

# SUPPLEMENTAL FIGURE 2

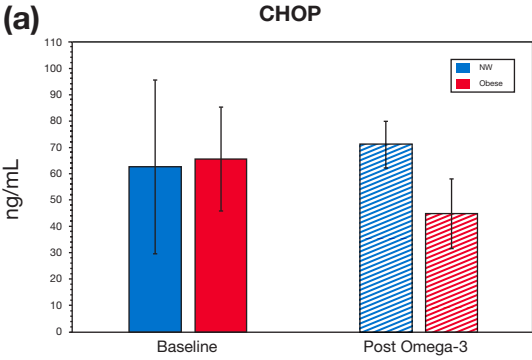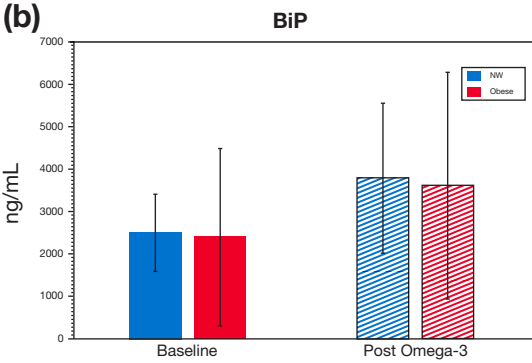

Supplement: Bauer_Supplemental_Fig_1,2.pdf [file Bauer_Supplemental_Fig_1%2C2.pdf]
